# Supplementary material
Source: publisher figshare collection journal article supplement (https://tandf.figshare.com/ndownloader/files/24462963)
Supplement: Supplementary file 1 [file 24462963]

**Supplemental Material**

Constituents of *Aegle marmelos* from Myanmar

Hnin Thanda Aung1*, Thu zar1, Myint Myint Sein1, Yumiko Komori3, Giovanni Vidari2, Yoshiaki Takaya3*

1Department of Chemistry, University of Mandalay, Maha Aungmyay Township, Mandalay, Myanmar

2Department of Medical Analysis, Faculty of Science, Tishk International University, Erbil 44001, Kurdistan Region, Iraq

3Faculty of Pharmacy, Meijo University, 150 Yagotoyama, Tempaku, Nagoya, 468-8503, Japan

ytakaya@meijo-u.ac.jp, hninthandaaung07@gmail.com

**Contents**

SM-Table 1 1H-NMR and 13C-NMR signals of compound **1** and reported data of 7´-*O*-methylmarmin (**6**) in CDCl3.

SM-Fig. 1 1H-NMR spectrum of 2´-*O*-Ethylmarmin (**1**) (600 MHz, CDCl3)

SM-Fig. 2 1H-NMR spectrum of 2´-*O*-Ethylmarmin (**1**) (150 MHz, CDCl3)

SM-Fig. 3 HH-COSY spectrum of 7´-*O*-ethylmarmin (**1**)

SM-Fig. 4 NOESY spectrum of 7´-*O*-ethylmarmin (**1**)

SM-Fig. 5 HSQC spectrum of 7´-*O*-ethylmarmin (**1**)

SM-Fig. 6 HMBC spectrum of 7´-*O*-ethylmarmin (**1**)

SM-Table 2 1H-NMR and 13C-NMR data of compound **5** and reported data of acetyltembamide (**9**)

SM-Fig. 7 1H-NMR spectrum of 2´-*O*-Ethyltembamide (**5**) (600 MHz, methanol-*d*4)

SM-Fig. 8 13C-NMR spectrum of 2´-*O*-Ethyltembamide (**5**) (150 MHz, methanol-*d*4)

SM-Fig. 9 HH-COSY spectrum of 2´-*O*-Ethyltembamide (**5**)

SM-Fig. 10 NOESY spectrum of 2´-*O*-Ethyltembamide (**5**)

SM-Fig. 11 HSQC spectrum of 2´-*O*-Ethyltembamide (**5**)

SM-Fig. 12 HMBC spectrum of 2´-*O*-Ethyltembamide (**5**)

SM-Table 1. 1H-NMR and 13C-NMR signals of compound **1** and reported data of 7´-*O*-methylmarmin (**6**) [6] in CDCl3.

|  | 7´-*O*-Ethylmarmin (**1**) | |  | 7´-*O*-Methylmarmin (**6**) | |
| --- | --- | --- | --- | --- | --- |
| H/C | **Ha | **Cb |  | **Hc | **Cd |
| 2 | — | 161.2 s |  | — | 161.1 s |
| 3 | 6.24 (1H, d, *J* = 9.4 Hz) | 112.9 d |  | 6.24 (1H, d, *J* = 9.5 Hz) | 112.7 d |
| 4 | 7.63 (1H, d, *J* = 9.4 Hz) | 143.4 d |  | 7.64 (1H, d, *J* = 9.5 Hz) | 143.4 d |
| 4a | — | 112.4 s |  | — | 112.3 s |
| 5 | 7.36 (1H, d, *J* = 8.5 Hz) | 128.7 d |  | 7.36 (1H, d, *J* = 8.5 Hz) | 128.6 d |
| 6 | 6.85 (1H, dd, *J* = 2.4, 8.5 Hz) | 113.2 d |  | 6.85 (1H, dd, *J* = 2.4, 8.5 Hz) | 113.0 d |
| 7 | — | 162.2 s |  | — | 161.2 s |
| 8 | 6.82 (1H, d, *J* = 2.4 Hz) | 101.6 d |  | 6.82 (1H, d, *J* = 2.4 Hz) | 101.4 d |
| 8a | — | 155.9 s |  | — | 155.7 s |
| 1´ | 4.61 (2H, d, *J* = 6.5 Hz) | 65.5 t |  | 4.61 (2H, d, *J* = 6.3 Hz) | 65.3 t |
| 2´ | 5.52 (1H, t, *J* = 6.5 Hz) | 118.7 d |  | 5.52 (1H, t, *J* = 6.3 Hz) | 118.5 d |
| 3´ | — | 142.5 s |  | — | 142.2 s |
| 4´ | 2.14 (1H, ddd, *J* = 4.8, 10.1, 14.9 Hz)  2.41 (1H, ddd, *J* = 6.6, 9.7, 14.9 Hz) | 36.6 t |  | 2.16 (1H, m), 2.39 (1H, m) | 36.5 t |
| 5´ | 1.44 – 1.50 (1H, m),  1.53 – 1.58 (1H, m) | 29.2 t |  | 1.471.58 (2H, m) | 29.1 t |
| 6´ | 3.40 (1H, dd, *J* = 2.4, 10.0 Hz) | 76.4 d |  | 3.42 (1H, dd, *J* = 2.4, 10.0 Hz) | 76.1 d |
| 7´ | — | 78.0 s |  | — | 77.3 s |
| 3´-Me | 1.78 (3H, s) | 16.9 q |  | 1.78 (3H, s) | 16.7 q |
| 7´-Me | 1.09 (3H, s) | 19.3 q |  | 1.10 (3 H, s) | 18.9 q |
| 7´-Me | 1.12 (3H, s) | 21.5 q |  | 1.12 (3H, s) | 20.5 q |
| 7´-OMe | — |  |  | 3.22 (3H, s) | 48.9 q |
| 7´-OCH2CH3 | 3.43 (2H, q, *J* = 7.0 Hz) | 56.4 t |  | — | — |
| 7´-OCH2CH3 | 1.15 (3H, t, *J* = 7.0 Hz) | 16.1 q |  | — | — |

a 600 MHz; b 150 MHz; c 500 MHz; d 125 MHz

SM-Fig. 1 1H-NMR spectrum of 7´-*O*-ethylmarmin (**1**) (600 MHz, CDCl3)

SM-Fig. 2 13C-NMR spectrum of 7´-*O*-ethylmarmin (**1**) (150 MHz, CDCl3)

SM-Fig. 3 HH-COSY spectrum of 7´-*O*-ethylmarmin (**1**)

SM-Fig. 4 NOESY spectrum of 7´-*O*-ethylmarmin (**1**)

SM-Fig. 5 HSQC spectrum of 7´-*O*-ethylmarmin (**1**)

SM-Fig. 6 HMBC spectrum of 7´-*O*-ethylmarmin (**1**)

SM-Table 2. 1H-NMR and 13C-NMR data of compound **5** and reported data of acetyltembamide (**9**) [12].

|  | 2´-*O*-Ethyltembamide (**5**) | |  | Acetyltembamide (**9**) | |
| --- | --- | --- | --- | --- | --- |
| H/C | **a | **Cb |  | **c | **Cd |
| 1 | 3.56 (1H, dd, *J* = 13.6, 5.2 Hz)  3.52 (1H, dd, *J* = 13.6, 7.9 Hz) | 47.5 t |  | 3.85 (2H, t, *J* = 6 Hz) | 45.0 t |
| 2 | 4.51 (1H, dd, *J* = 5.2, 7.9 Hz) | 81.1 d |  | 5.97 (1H, *J* = 6 Hz) | 75.0 d |
| 1´ | — | 133.5 s |  | — | 130.8 s |
| 2´, 6´ | 7.28 (2H, d, *J* = 8.6 Hz) | 129.1 d |  | 7.35 (2H, d, *J* =9 Hz) | 128.0 d |
| 3´, 5´ | 6.92 (2H, d, *J* = 8.6 Hz) | 114.9 d |  | 6.92 (2H, d, *J* = 9 Hz) | 115.3 d |
| 4´ | — | 161.0 s |  | — | 161.0 s |
| 1´´ | — | 135.8 s |  | — | 135.5 s |
| 2´´, 6´´ | 7.75 (2H, br d, *J* = 7.5 Hz) | 128.2 d |  | 7.75 (2H, m) | 129.7 d |
| 3´´, 5´´ | 7.44 (2H, br d, *J* = 7.5 Hz)  7.53 (1H, t, *J* = 7.0 Hz) | 129.5 d |  | 7.50 (2H, m)  7.50 (1H, m) | 129.2 d |
| 4´´ | 132.6 d |  | 132.6 d |
| 4´-OMe | 3.78 (3H, s) | 55.7 q |  | 3.83 (3H, s) | 55.6 q |
| -CONH | — | 170.3 s |  | — | 168.5 s |
| CONH | — | — |  | 6.40 (1H, br s) | — |
| OCOCH3 | — | — |  | 2.12 (3H, s) | 21.5 q |
| OCOCH3 | — | — |  | — | 172.0 s |
| 2-OCH2CH3 | 3.343.45 (2H, m) | 65.1 t |  | — | — |
| 2-OCH2CH3 | 1.16 (3H, t, *J* = 7.0 Hz) | 15.6 q |  | — | — |

a MeOD, 600 MHz; b MeOD,150 MHz; c CDCl3, 80 MHz; d CDCl3, 20 MHz.

SM-Fig. 7 1H-NMR spectrum of 2´-*O*-Ethyltembamide (**5**) (600 MHz, methanol-*d*4)

SM-Fig. 8 13C-NMR spectrum of 2´-*O*-Ethyltembamide (**5**) (150 MHz, methanol-*d*4)

SM-Fig. 9 HH-COSY spectrum of 2´-*O*-Ethyltembamide (**5**)

SM-Fig. 10 NOESY spectrum of 2´-*O*-Ethyltembamide (**5**)

SM-Fig. 11 HSQC spectrum of 2´-*O*-Ethyltembamide (**5**)

SM-Fig. 12 HMBC spectrum of 2´-*O*-Ethyltembamide (**5**)
